# Supplementary material for: Hi-fun, homepas and incidental sex with drugs: a qualitative study developing a locally grounded definition of hi-fun (chemsex) compared to other sexualised drug use types practiced by gay, bisexual and other men who have sex with men in Thailand.
Source: Research Square preprint supplement (doi:10.21203/rs.3.rs-7211745/v1), 2025-07-29
Supplement: Supplementary file 2 [file e433f8800e9de3bfe5c8aa2a.docx]

## Focus participant information sheet – English version

Participant Information Sheet – Focus group

*In this document, there may be some statements that you do not understand. Please ask the principal investigator or her representative to give you explanations until they are well understood. To help your decision making in participating the research, you may bring this document home to read and consult your relatives and intimates.*

**Title of Research Project:** What does it mean to me*? Understanding* hi-fun *and other types of sex with drugs between men*.

**Names of Researchers:**

Dr. Thomas Guadamuz, Associate Professor at Mahidol University

Dr. Charles Witzel, Senior Research Fellow at University College London

**Workplace address**: 999 Phuttamonthon 4 Road, Salaya, Nakhon Pathom 73170, Thailand.

**Tel:** 082 643 5290, 086 084 4154
**E-mails:** Charles Witzel: [c.witzel@ucl.ac.uk](mailto:c.witzel@ucl.ac.uk), Thomas Gudadamuz: [thomas.gua@mahidol.edu](mailto:thomas.gua@mahidol.edu)

**Source of funding:** Wellcome Trust

**Research objective**

This research project aims to understand the meanings and motivations that influence *hi-fun* and other types of sex using drugs between men. We also want to understand how *hi-fun* might be different from other kinds of sex with drugs that men have together. We want to understand both positive and negative aspects of combining sex and drugs so that we can take these into account in further research and when planning services.

**Why you are asked to participate**

You are invited to participate in this research project because you are a man (either cis or transgender) have experience of having sex with drugs with another man (either cis or transgender) in the last 12 months and are aged 18 or older. There will be about 40 participants, and the research will last for 6 months (from March to August 2024).

**How you would participate**

If you decide to participate in the research project, you will take part in a focus group with 5-7 other men. Before this focus group we will ask you to provide some details about yourself through a short questionnaire. This will be done either online ahead of time or on paper before the group. This questionnaire asks about your sex assigned at birth, your sexuality, your educational level, which country you were born in, questions about your sexual health and which drugs you have used.

The focus group will be facilitated by two members of the study team. During this group there will be a discussion about *hi-fun* and other types of sex with drugs, and what these ideas mean to you. We will explore what influences how men might combine sex and drugs, including motivations, gay culture, and technology. We will also talk about some of the strengths that communities of men who have sex with drugs have, as well as some of the problems they might face. We will only ask questions about these things generally.

Groups will be in Bangkok, Pattaya and Khon Kaen. The focus group venue will be a location chosen by the researchers. This will be a private space where we will not be disturbed by people who are not in the group. The focus groups are estimated to last between 2 to 2.5 hours each and you will only be able to participate once. There will be focus groups in Thai and in English. You can choose which language you would like to participate in. The groups will be audio recorded.

**Benefits of participation**

You may benefit from learning more about these issues and discussing your views, especially if it is difficult to talk about these topics with your friends.

We will use the study findings to help develop new ways of supporting men who have *hi-fun* and other types of sex with drugs. This may help reduce harms to individuals and communities by developing new understandings of how services can meet the needs of men who have sex with drugs. This will also benefit Thailand by improving support for LGBTQ health in the country, while also reducing overall health and well-being harms.

**Risks of participation**

Participating in the study means that you may share sensitive information and we may talk about topics that could be emotionally difficult. Some questions may create uneasiness or discomfort. You always have the right to choose not to answer any question, and you can leave the focus group at any time.

We will ask all members of the group not to share any information from the group with others. However, we cannot control what other people do outside the group. For that reason, and because drug use is illegal in Thailand, we will not ask about your own experiences of *hi-fun* or other types of sex with drugs. We also ask that you not to share your own experiences of drug use to limit this risk.

If additional information arises about benefits and risks of the research project, the researcher will inform you immediately and without concealing these.

**Handling of private information**

The focus groups will be recorded, written-up and translated by specialist organizations. These organizations will not be allowed to share any of your personal information with anyone except for the researchers. All data from the focus groups will be held securely in the University College London Data Safe Haven and accessible only to researchers working on this study. This Data Safe Haven is located in the UK.

The lawful basis to process your personal data under the UK general data protection regulation (GDPR) is: ‘public task’ and ‘research purposes’. Your personal data will be processed so long as it is required for the research project. If we are able to anonymise the personal data, you provide we will undertake this and will minimise the processing of personal data wherever possible.

Any private information that would make it possible to identify you will be kept confidential and will never be included in any sort of report. Only the researcher team will analyze the information, and information about you will be treated so that unauthorized persons cannot access them.

If you are concerned about how your personal data is being processed, or if you would like to contact us about your rights, please contact UCL in the first instance at data-protection@ucl.ac.uk

**Compensation for participation**

When participating in this research project you will be compensated with 1,000 THB. No expenses by you as a participant are required.

**Participating and withdrawing**

You are free to decide whether to participate or not. As a participant, you have the right to withdraw from the project without prior notice, and the refusal to participate or the withdrawal from the research project will not at all affect any service or treatment. If you wish to withdraw after the focus group you are able to do so until two weeks following data collection. After this time, it may not be possible to remove your data from the project although we will make every effort to do so if you wish.

**Discomfort and other issues**

If you experience uneasiness or discomfort due to participating in the research project, the researcher is happy to answer all of your questions or concerns. If you have comments, questions or complaints about this research, please feel free to call Charles Witzel (English version) or Thomas Guadamuz (Thai version) at 082 643 5290 and 086 084 4154.

On the condition that you are not treated as indicated in this information sheet, you can contact the Chair of The Committee for Research Ethics (Social Sciences)at the office of MUSSIRB, Office of Faculty of Social Sciences and Humanities, Mahidol University, Tel: 02 441 9180, Fax: 02 441 9181, E-mail: [mussirb310@gmail.com](mailto:mussirb310@gmail.com). You may also contact the University College London Research Ethics committee at [ethics@ucl.ac.uk](mailto:ethics@ucl.ac.uk).

If you need information or support around sexual health including *hi-fun* and other types of sex with drugs, you can contact a member of the study team or visit testBKK.org. This website provides information and a list of services across Thailand including helplines.

**Who is running the study?**

This research is a collaboration between Mahidol University, University College London and other community organisations in Thailand, including IHRI, APCOM and the Ozone Foundation. It has been funded by the Wellcome Trust as part of a larger project understanding how men combine sex and drugs and what support they might need.

Sincerely,

Assoc. Prof. Dr. Thomas Guadamuz ([thomas.gua@mahidol.edu](mailto:thomas.gua@mahidol.edu))
Dr. Charles Witzel ([c.witzel@ucl.ac.uk](mailto:c.witzel@ucl.ac.uk))

Faculty of Social Sciences and Humanities

[22 December 2023]

## Focus group participant information sheet – Thai version

🙠 เอกสารชี้แจงผู้เข้าร่วมการวิจัย สำหรับการประชุมกลุ่ม 🙢[[1]](#footnote-1)

**คำชี้แจง :** ในเอกสารฉบับนี้อาจมีข้อความที่ท่านอ่านแล้วยังไม่เข้าใจ โปรดสอบถามหัวหน้าโครงการวิจัย หรือผู้แทนให้ช่วยอธิบายจนกว่าท่านจะเข้าใจดี

| **ชื่อโครงการ** | What does it mean to me? การศึกษา "ไฮฟัน (hi-fun)" และสารทางเพศประเภทต่าง ๆ ระหว่างชายด้วยกัน |
| --- | --- |
| **ชื่อผู้วิจัย** | รศ.ดร.โธมัส กวาดามูซ และ ดร.ชาร์ลี วิทเซล |
| **สถานที่ทำงาน** | ภาควิชาสังคมและสุขภาพ คณะสังคมศาสตร์และมนุษยศาสตร์ |
| **หมายเลขโทรศัพท์** | 082 643 5290, 086 084 4154 |
| **ช่องทางการติดต่ออื่น ๆ** | c.witzel@ucl.ac.uk |
| **สถานที่วิจัย** | กรุงเทพ พัทยา และขอนแก่น |
| **ผู้ให้ทุนวิจัย** | Wellcome Trust |

**ข้อมูลโครงการวิจัยโดยย่อ :** โครงการวิจัยนี้จัดทำขึ้นเพื่อทำความเข้าใจความหมายและแรงจูงใจที่มีอิทธิพลต่อ “ไฮ-ฟัน (hi-fun)” และการใช้สารเสพติดทางเพศระหว่างผู้ชาย นอกจากนั้นยังเพื่อทำความเข้าใจความแตกต่างระหว่าง ไฮ-ฟันและสารเสพติดทางเพศประเภทอื่น ๆ รวมถึงความเข้าใจในประเด็นเรื่องการใช้สารเสพติดกับการมีเพศสัมพันธ์ ทั้งในเชิงบวกและเชิงลบ เพื่อนำไปสู่การวิจัยในอนาคตและการวางแผนให้บริการต่อไป

**ประโยชน์ที่คาดว่าจะได้รับจากการวิจัยนี้คือ** ท่านอาจได้รับประโยชน์จากการเรียนรู้เพิ่มเติมเกี่ยวกับประเด็นเหล่านี้และยังได้ร่วมแลกเปลี่ยนมุมมองของท่าน โดยเฉพาะอย่างยิ่งหากท่านไม่สามารถพูดถึงประเด็นเหล่านี้กับเพื่อนของท่านได้ นอกจากนี้แล้วทางโครงการจะใช้ผลการศึกษานี้เพื่อช่วยพัฒนาวิธีการใหม่ๆ ในการสนับสนุนผู้ชายที่ไฮ-ฟัน (hi-fun) รวมถึงการใช้สารเสพติดอื่น ๆ ร่วมกับการเพศสัมพันธ์ สิ่งนี้อาจช่วยลดอันตรายต่อปัจเจกและชุมชนได้โดยการพัฒนาความเข้าใจใหม่ว่าบริการต่าง ๆ สามารถตอบสนองความต้องการของผู้ชายที่มีเพศสัมพันธ์กับการใช้สารเสพติดได้อย่างไร สิ่งนี้จะเป็นประโยชน์ต่อประเทศไทยด้วยเช่นกันในการการปรับปรุงการสนับสนุนด้านสุขภาพของ LGBTQ ในประเทศ ในขณะเดียวกันก็ลดอันตรายต่อสุขภาพและคุณภาพชีวิตโดยรวมด้วย

**ท่านได้รับเชิญให้เข้าร่วมการวิจัยนี้เพราะ** ท่านเป็นผู้ชาย (ทั้งบุคคลที่มีอัตลักษณ์ทางเพศตรงกับเพศที่กำหนด/บุคคลข้ามเพศ) มีประสบการณ์การมีเพศสัมพันธ์ด้วยยาเสพติดกับชายอีกคนหนึ่ง (ทั้งบุคคลที่มีอัตลักษณ์ทางเพศตรงกับเพศที่กำหนด/บุคคลข้ามเพศ) ในช่วง 12 เดือนที่ผ่านมา

**จำนวนผู้เข้าร่วมการวิจัยทั้งสิ้น** 40 คน

**ระยะเวลาที่จะทำวิจัยทั้งสิ้น** 6 เดือน (เดือนมีนาคม 2567 ถึงเดือนสิงหาคม 2567)

**หากท่านตัดสินใจเข้าร่วมการวิจัยแล้ว** ผู้วิจัยจะขอให้ท่านร่วมแสดงความคิดเห็นในประเด็นเกี่ยวกับ “การให้ความหมายต่อ ไฮ-ฟัน (hi-fun)” และใช้สารเสพติดทางเพศประเภทอื่น ๆ นอกจากนั้นทางทีมวิจัยสนใจความคิดเห็นของท่านในประเด็นเกี่ยวกับการผสมผสานเรื่องเพศและสารเสพติด แรงจูงใจ วัฒนธรรมเกย์ และเทคโนโลยี และจะมีการพูดคุยกันถึงจุดแข็งของชุมชนชายรักชายที่ใช้สารเสพติด รวมถึงปัญหาบางอย่างที่พวกเขาอาจเผชิญ ทางทีมวิจัยจะถามคำถามเกี่ยวกับสิ่งเหล่านี้โดยทั่วไปเท่านั้น และจะไม่ขอให้ท่านแบ่งปันประสบการณ์ส่วนตัวของท่าน” โดยใช้เวลาในการประชุมกลุ่มประมาณ 2 -2.5 ชั่วโมง

- ข้อมูลที่ได้จากการการประชุมกลุ่ม ผู้วิจัยจะขออนุญาต บันทึกเสียง และถอดเทป และจะดำเนินการทำลายข้อมูลที่ระบุถึงตัวท่านด้วยการลบข้อมูลในระบบการจัดเก็บข้อมูลของโครงการ ภายหลังเสร็จสิ้นการวิจัย (31 ตุลาคม 2572)
- หากมีข้อมูลใหม่ที่เกี่ยวข้องกับโครงการวิจัย ผู้วิจัยจะแจ้งให้ผู้เข้าร่วมการวิจัยทราบโดยเร็ว ไม่ปิดบัง
- ความเสี่ยงที่อาจจะเกิดขึ้นเมื่อเข้าร่วมการวิจัย ท่านอาจรู้สึกอึดอัด หรืออาจรู้สึกไม่สบายใจอยู่บ้างกับบางคำถาม ท่านมีสิทธิ์ที่จะไม่ตอบคำถามเหล่านั้นได้ รวมถึงท่านมีสิทธิ์ถอนตัวออกจากโครงการนี้เมื่อใดก็ได้ โดยไม่ต้องแจ้งให้ทราบล่วงหน้า และการไม่เข้าร่วมวิจัยหรือถอนตัวออกจากโครงการวิจัยนี้ จะไม่มีผลกระทบใด ๆ ต่อท่าน
- ข้อมูลส่วนตัวของท่านจะถูกเก็บรักษาไว้ ไม่เปิดเผยต่อสาธารณะเป็นรายบุคคล แต่จะรายงานผลการวิจัยเป็นข้อมูลส่วนรวมและนิรนาม ผู้ที่มีสิทธิ์เข้าถึงข้อมูลของท่านจะมีเฉพาะผู้ที่เกี่ยวข้องกับการวิจัยนี้ และคณะกรรมการจริยธรรมการวิจัยในคนเท่านั้น
- การวิจัยครั้งนี้ท่านจะได้รับค่าตอบแทน 1,000 บาท และไม่เสียค่าใช้จ่ายใด ๆ ทั้งสิ้น
- หากท่านมีข้อข้องใจที่จะสอบถามเกี่ยวกับการวิจัยนี้ ท่านสามารถติดต่อไปยังรศ.ดร.โธมัส กวาดามูซ หมายเลขโทรศัพท์ 086 084 4154 และ ดร.ชาร์ลี วิทเซล หมายเลขโทรศัพท์ 082 643 5290 ได้ตลอดเวลา และถ้าท่านมีข้อกังวลเกี่ยวกับข้อมูลของท่านสามารถติดต่อไปที่ data-protection@ucl.ac.uk ได้ตลอดเวลา
- หากท่านได้รับการปฏิบัติไม่ตรงตามที่ระบุไว้ ท่านสามารถติดต่อกับประธานคณะกรรมการจริยธรรมฯ หรือผู้แทน ที่สำนักงานฯ ซึ่งตั้งอยู่ที่คณะสังคมศาสตร์และมนุษยศาสตร์ มหาวิทยาลัยมหิดล ถนนพุทธมณฑลสาย 4 ตำบลศาลายา อำเภอพุทธมณฑล จังหวัดนครปฐม 73170 หมายเลขโทรศัพท์ 0 2441 9180 อีเมล mussirb310@gmail.com

**ขอขอบคุณที่กรุณาสละเวลาในการเข้าร่วมประชุมกลุ่ม**

**ขอแสดงความนับถือ**

**รศ.ดร.โธมัส กวาดามูซ และ ดร.ชาร์ลี วิทเซล**

## Interview participant information sheet – English version

Participant Information Sheet - Interview

*In this document, there may be some statements that you do not understand. Please ask the principal investigator or her representative to give you explanations until they are well understood. To help your decision making in participating the research, you may bring this document home to read and consult your relatives and intimates.*

**Title of Research Project:** What does it mean to me*? Understanding* hi-fun *and other types of sex with drugs between men*.

**Names of Researchers:**

Dr. Thomas Guadamuz, Associate Professor at Mahidol University

Dr. Charles Witzel, Senior Research Fellow at University College London

**Workplace address**: 999 Phuttamonthon 4 Road, Salaya, Nakhon Pathom 73170, Thailand.

**Tel:** 082 643 5290, 086 084 4154
**E-mails:** Charles Witzel: [c.witzel@ucl.ac.uk](mailto:c.witzel@ucl.ac.uk), Thomas Gudadamuz: [thomas.gua@mahidol.edu](mailto:thomas.gua@mahidol.edu)

**Research objective**

This research project aims to understand the meanings and motivations that influence *hi-fun* and other types of sex using drugs between men. We also want to understand how *hi-fun* might be different from other kinds of sex with drugs that men have together. We want to understand both positive and negative aspects of combining sex and drugs so that we can take these into account in further research and when planning services.

**Why you are asked to participate**

You are invited to participate in this research project because you are a man (either cis or transgender) have experience of having sex with drugs with another man (either cis or transgender) in the last 12 months and are aged 18 or older. There will be about 40 participants, and the research will last for 6 months (from March to August 2024).

**How you would participate**

If you decide to participate in the research project, you will take part in an interview with a member of the study team. Before the interview we will ask you to provide some details about yourself through a short questionnaire. This will be done either online ahead of time or on paper before the interview. This questionnaire asks about your sex assigned at birth, your sexuality, your educational level, which country you were born in, questions about your sexual health and which drugs you have used.

During the interview we will talk about *hi-fun* and other types of sex with drugs, as what these ideas mean to you. We will explore what influences how men might combine sex and drugs, including motivations, gay culture, and technology. We will also talk about some of the strengths that communities of men who have sex with drugs have, as well as some of the problems they might face. We will not directly ask you about your own experiences of *hi-fun* or other types of drug use.

Interviews will be in Bangkok, Pattaya and Khon Kaen. The venue will be a location chosen by you and the researchers. This will be a private space where we will not be disturbed by other people. The interview will last up to one hour and you can only participate once. There will be interviews in Thai and in English. You can choose which language you would like to participate in. The interviews will be audio recorded.

**Benefits of participation**

You may benefit from learning more about these issues and discussing your views, especially if it is difficult to talk about these topics with your friends.

We will use the study findings to help develop new ways of supporting men who have *hi-fun* and other types of sex with drugs. This may help reduce harms to individuals and communities by developing new understandings of how services can meet the needs of men who have sex with drugs. This will also benefit Thailand by improving support for LGBTQ health in the country, while also reducing overall health and well-being harms.

**Risks of participation**

Participating in the study means that you may share sensitive information and we may talk about topics that could be emotionally difficult. Some questions may create uneasiness or discomfort. You always have the right to choose not to answer any question, and you can stop the interview at any time.

If additional information arises about benefits and risks of the research project, the researcher will inform the participant immediately and without concealing these.

**Handling of private information**

The interview will be recorded, written-up and translated by specialist organizations. These organizations will not be allowed to share any of your personal information with anyone except for the researchers. All data from the interviews will be held securely in the University College London Data Safe Haven and accessible only to researchers working on this study. This Data Safe Haven is located in the UK. The lawful basis to process your personal data under the UK general data protection regulation (GDPR) is: ‘public task’ and ‘research purposes’. Your personal data will be processed so long as it is required for the research project. If we are able to anonymise the personal data you provide we will undertake this and will minimise the processing of personal data wherever possible.

Any private information that would make it possible to identify you will be kept confidential and will never be included in any sort of report. Only the researcher team will analyze the information, and information about you will be treated so that unauthorized persons cannot access them.

**Compensation for participation**

When participating in this research project you will be compensated with 1,000 THB. No expenses by you as a participant are required.

**Participating and withdrawing**

You are free to decide whether to participate or not. As a participant, you have the right to withdraw from the project without prior notice, and the refusal to participate or the withdrawal from the research project will not at all affect any service or treatment. If you wish to withdraw after the focus group you are able to do so until two weeks following data collection. After this time, it may not be possible to remove your data from the project although we will make every effort to do so if you wish.

**Discomfort and other issues**

If you experience uneasiness or discomfort due to participating in the research project, the researcher is happy to answer all of your questions or concerns. If you have comments, questions or complaints about this research, please feel free to call Charles Witzel (English version) or Thomas Guadamuz (Thai version) at 082 643 5290 and 086 084 4154.

On the condition that you are not treated as indicated in this information sheet, you can contact the Chair of The Committee for Research Ethics (Social Sciences)at the office of MUSSIRB, Office of Faculty of Social Sciences and Humanities, Mahidol University, Tel: 02 441 9180, Fax: 02 441 9181, E-mail: [mussirb310@gmail.com](mailto:mussirb310@gmail.com). You may also contact the Chair of the University College London Research Ethics committee at [ethics@ucl.ac.uk](mailto:ethics@ucl.ac.uk).

**Who is running the study?**

This research is a collaboration between Mahidol University, University College London and other community organisations in Thailand, including IHRI, APCOM and the Ozone Foundation. It has been funded by the Wellcome Trust as part of a larger project understanding how men combine sex and drugs and what support they might need.

Sincerely,

Assoc. Prof. Dr. Thomas Guadamuz and Dr. Charles Witzel.

Faculty of Social Sciences and Humanities

## Interview participant information sheet – Thai version

🙠 เอกสารชี้แจงผู้เข้าร่วมการวิจัย สำหรับการสัมภาษณ์เชิงลึก[[2]](#footnote-2) 🙢

**คำชี้แจง :** ในเอกสารฉบับนี้อาจมีข้อความที่ท่านอ่านแล้วยังไม่เข้าใจ โปรดสอบถามหัวหน้าโครงการวิจัย หรือผู้แทนให้ช่วยอธิบายจนกว่าท่านจะเข้าใจดี

| **ชื่อโครงการ** | What does it mean to me? การศึกษา "ไฮฟัน (hi-fun)" และสารทางเพศประเภทต่าง ๆ ระหว่างชายด้วยกัน |
| --- | --- |
| **ชื่อผู้วิจัย** | รศ.ดร.โธมัส กวาดามูซ และ ดร.ชาร์ลี วิทเซล |
| **สถานที่ทำงาน** | ภาควิชาสังคมและสุขภาพ คณะสังคมศาสตร์และมนุษยศาสตร์ |
| **หมายเลขโทรศัพท์** | 082 643 5290, 086 084 4154 |
| **ช่องทางการติดต่ออื่น ๆ** | c.witzel@ucl.ac.uk |
| **สถานที่วิจัย** | กรุงเทพ พัทยา และขอนแก่น |
| **ผู้ให้ทุนวิจัย** | Wellcome Trust |

**ข้อมูลโครงการวิจัยโดยย่อ :** โครงการวิจัยนี้จัดทำขึ้นเพื่อทำความเข้าใจความหมายและแรงจูงใจที่มีอิทธิพลต่อ “ไฮ-ฟัน (hi-fun)” และการใช้สารเสพติดทางเพศระหว่างผู้ชาย นอกจากนั้นยังเพื่อทำความเข้าใจความแตกต่างระหว่าง ไฮ-ฟันและสารเสพติดทางเพศประเภทอื่น ๆรวมถึงความเข้าใจในประเด็นเรื่องการใช้สารเสพติดกับการมีเพศสัมพันธ์ ทั้งในเชิงบวกและเชิงลบ เพื่อนำไปสู่การวิจัยในอนาคตและการวางแผนให้บริการต่อไป

**ประโยชน์ที่คาดว่าจะได้รับจากการวิจัยนี้คือ** ท่านอาจได้รับประโยชน์จากการเรียนรู้เพิ่มเติมเกี่ยวกับประเด็นเหล่านี้และยังได้ร่วมแลกเปลี่ยนมุมมองของท่าน โดยเฉพาะอย่างยิ่งหากท่านไม่สามารถพูดถึงประเด็นเหล่านี้กับเพื่อนของท่านได้ นอกจากนี้แล้วทางโครงการจะใช้ผลการศึกษานี้เพื่อช่วยพัฒนาวิธีการใหม่ๆ ในการสนับสนุนผู้ชายที่ไฮ-ฟัน (hi-fun) รวมถึงการใช้สารเสพติดอื่น ๆ ร่วมกับการเพศสัมพันธ์ สิ่งนี้อาจช่วยลดอันตรายต่อปัจเจกและชุมชนได้โดยการพัฒนาความเข้าใจใหม่ว่าบริการต่าง ๆ สามารถตอบสนองความต้องการของผู้ชายที่มีเพศสัมพันธ์กับการใช้สารเสพติดได้อย่างไร สิ่งนี้จะเป็นประโยชน์ต่อประเทศไทยด้วยเช่นกันในการการปรับปรุงการสนับสนุนด้านสุขภาพของ LGBTQ ในประเทศ ในขณะเดียวกันก็ลดอันตรายต่อสุขภาพและคุณภาพชีวิตโดยรวมด้วย

**ท่านได้รับเชิญให้เข้าร่วมการวิจัยนี้เพราะ** ท่านเป็นผู้ชาย (ทั้งบุคคลที่มีอัตลักษณ์ทางเพศตรงกับเพศที่กำหนด/บุคคลข้ามเพศ) มีประสบการณ์การมีเพศสัมพันธ์ด้วยยาเสพติดกับชายอีกคนหนึ่ง (ทั้งบุคคลที่มีอัตลักษณ์ทางเพศตรงกับเพศที่กำหนด/บุคคลข้ามเพศ) ในช่วง 12 เดือนที่ผ่านมา

**จำนวนผู้เข้าร่วมการวิจัยทั้งสิ้น** 40 คน

**ระยะเวลาที่จะทำวิจัยทั้งสิ้น** 6 เดือน (เดือนมีนาคม 2567 ถึงเดือนสิงหาคม 2567)

**หากท่านตัดสินใจเข้าร่วมการวิจัยแล้ว**แสดงความคิดเห็นในประเด็นเกี่ยวกับ “การให้ความหมายต่อ ไฮ-ฟัน (hi-fun)” และใช้สารเสพติดทางเพศประเภทอื่น ๆ นอกจากนั้นทางทีมวิจัยสนใจความคิดเห็นของท่านในประเด็นเกี่ยวกับการผสมผสานเรื่องเพศและสารเสพติด แรงจูงใจ วัฒนธรรมเกย์ และเทคโนโลยี และจะมีการพูดคุยกันถึงจุดแข็งของชุมชนชายรักชายที่ใช้สารเสพติด รวมถึงปัญหาบางอย่างที่พวกเขาอาจเผชิญ ทางทีมวิจัยจะถามคำถามเกี่ยวกับสิ่งเหล่านี้โดยทั่วไปเท่านั้น และจะไม่ขอให้ท่านแบ่งปันประสบการณ์ส่วนตัวของท่าน” โดยใช้เวลาในการสัมภาษณ์ประมาณ 2 -2.5 ชั่วโมง

- ข้อมูลที่ได้จากการสัมภาษณ์ ผู้วิจัยจะขออนุญาต บันทึกเสียง และถอดเทป และจะดำเนินการทำลายข้อมูลที่ระบุถึงตัวท่านด้วยการลบข้อมูลในระบบการจัดเก็บข้อมูลของโครงการ ภายหลังเสร็จสิ้นการวิจัย (31 ตุลาคม 2572)
- หากมีข้อมูลใหม่ที่เกี่ยวข้องกับโครงการวิจัย ผู้วิจัยจะแจ้งให้ผู้เข้าร่วมการวิจัยทราบโดยเร็ว ไม่ปิดบัง
- ความเสี่ยงที่อาจจะเกิดขึ้นเมื่อเข้าร่วมการวิจัย ท่านอาจรู้สึกอึดอัด หรืออาจรู้สึกไม่สบายใจอยู่บ้างกับบางคำถาม ท่านมีสิทธิ์ที่จะไม่ตอบคำถามเหล่านั้นได้ รวมถึงท่านมีสิทธิ์ถอนตัวออกจากโครงการนี้เมื่อใดก็ได้ โดยไม่ต้องแจ้งให้ทราบล่วงหน้า และการไม่เข้าร่วมวิจัยหรือถอนตัวออกจากโครงการวิจัยนี้ จะไม่มีผลกระทบใด ๆ ต่อท่าน
- ข้อมูลส่วนตัวของท่านจะถูกเก็บรักษาไว้ ไม่เปิดเผยต่อสาธารณะเป็นรายบุคคล แต่จะรายงานผลการวิจัยเป็นข้อมูลส่วนรวมและนิรนาม ผู้ที่มีสิทธิ์เข้าถึงข้อมูลของท่านจะมีเฉพาะผู้ที่เกี่ยวข้องกับการวิจัยนี้ และคณะกรรมการจริยธรรมการวิจัยในคนเท่านั้น
- การวิจัยครั้งนี้ท่านจะได้รับค่าตอบแทน 1,000 บาท และไม่เสียค่าใช้จ่ายใด ๆ ทั้งสิ้น
- หากท่านมีข้อข้องใจที่จะสอบถามเกี่ยวกับการวิจัยนี้ ท่านสามารถติดต่อไปยังรศ.ดร.โธมัส กวาดามูซ หมายเลขโทรศัพท์ 086 084 4154 และ ดร.ชาร์ลี วิทเซล หมายเลขโทรศัพท์ 082 643 5290 ได้ตลอดเวลา และถ้าท่านมีข้อกังวลเกี่ยวกับข้อมูลของท่านสามารถติดต่อไปที่ data-protection@ucl.ac.uk ได้ตลอดเวลา
- หากท่านได้รับการปฏิบัติไม่ตรงตามที่ระบุไว้ ท่านสามารถติดต่อกับประธานคณะกรรมการจริยธรรมฯ หรือผู้แทน ที่สำนักงานฯ ซึ่งตั้งอยู่ที่คณะสังคมศาสตร์และมนุษยศาสตร์ มหาวิทยาลัยมหิดล ถนนพุทธมณฑลสาย 4 ตำบลศาลายา อำเภอพุทธมณฑล จังหวัดนครปฐม 73170 หมายเลขโทรศัพท์ 0 2441 9180 อีเมล mussirb310@gmail.com

**ขอขอบคุณที่กรุณาสละเวลาในการสัมภาษณ์**

**ขอแสดงความนับถือ**

**รศ.ดร.โธมัส กวาดามูซ และ ดร.ชาร์ลี วิทเซล**

## Focus group informed consent script – English version

Informed consent script – Focus group

Do you hereby express your consent to participate as a subject in the research project entitled What does it mean to me*? Understanding* hi-fun *and other types of sex with drugs between men*.

In so doing, can you confirm you are informed of the research project’s origin and purpose; its procedures; its expected benefits and risks that may occur, including methods to prevent and handle harm; as well as remuneration and expenses? That you have thoroughly read the statements in the information sheet. You were also given explanations and my questions were answered by the researcher. Do you therefore consent to participate as a subject in this research project?

Can you confirm you are aware of your right to further information concerning benefits and risks from participation in the research project and your right to withdraw or refrain from participation at any time and without any consequence until two weeks after the focus group? After that time, it may not be possible to remove your data although we will make every effort to do so if you wish.

Can you confirm you are aware this focus group will be audio recorded, transcribed and possibly translated and that you understand that the transcribers, translators and focus group facilitators are bound by the same confidentiality rules as the other researchers on the study?

Can you confirm that you understand that you should not disclose any information you have heard from this group to anyone else?

Can you confirm you also understand that the researchers do not have control over what other study participants may say outside the group and that you may wish to be cautious about what you disclose about yourself in this group?

Can you confirm that you understand that we will not ask you about your personal experiences of drug use and other behaviours which might be illegal and we ask that you do not share them with the group?

Do you confirm that you consent to the researchers’ use of the information you share for this research, but do not to any individual disclosure of private information and that the information you provide must be presented as part of the research results as a whole?

Can you confirm that you understand that project data will be securely stored in the UCL Data Safe Haven, and that the legal basis for processing your data is social and historical research?

Can you confirm that you understand that at the end of the study anonymized data from this research will be placed in a secure data repository, with access strictly controlled by the lead researcher Dr Charles Witzel and Mahidol University?

Can you confirm that you understand that if you have any questions about the research procedures, you can contact [Charlie Witzel in English or Thomas Guadamuz in Thai].

Can you confirm you understand that if you are harmed in any way or are not treated as indicated in the information sheet, you can contact the Chair of The Committee for Research Ethics (Social Science) at the office of MUSSIRB. Their number is 02 441 9180.

Can you confirm you understand the statements in the participant information sheet and in this consent form and thereby give your consent?

## Focus group informed consent script – Thai version

สคริปต์ในการขอความยินยอม

คุณแสดงความยินยอมที่จะเข้าร่วมโครงการวิจัยที่มีชื่อว่า What does it mean to me? การศึกษา "ไฮฟัน (hi-fun)" และสารทางเพศประเภทต่าง ๆ ระหว่างชายด้วยกัน

ในการทำเช่นนั้น คุณช่วยยืนยันได้ไหมว่าคุณได้รับแจ้งถึงที่มาและวัตถุประสงค์ของโครงการวิจัย ขั้นตอนของโครงการประโยชน์และความเสี่ยงที่อาจเกิดขึ้น รวมถึงวิธีการป้องกันและจัดการกับอันตราย ตลอดจนค่าตอบแทนและค่าใช้จ่าย? คุณได้อ่านข้อความในเอกสารข้อมูลอย่างละเอียดแล้ว คุณได้รับคำอธิบายที่เพียงพอและได้ถามคำถามกับฉันและฉันได้ตอบคำถามและข้อสงสัยของคุณทั้งหมดแล้ว คุณยินยอมที่จะเข้าร่วมเป็นหัวข้อในโครงการวิจัยนี้หรือไม่?

คุณช่วยยืนยันได้หรือไม่ว่าคุณตระหนักถึงสิทธิ์ในข้อมูลเพิ่มเติมเกี่ยวกับผลประโยชน์และความเสี่ยงจากการเข้าร่วมโครงการวิจัย และสิทธิ์ของคุณในการถอนตัวหรืองดเว้นจากการเข้าร่วมเมื่อใดก็ได้ และไม่มีผลกระทบใด ๆ จนกว่าการวิเคราะห์ข้อมูลจะเริ่มขึ้น หลังจากเวลาดังกล่าว คุณอาจไม่สามารถลบข้อมูลของคุณได้

คุณยืนยันได้หรือไม่ว่าคุณทราบว่าการสนทนากลุ่มนี้จะถูกบันทึกเสียง ถอดเสียง และอาจแปล และคุณเข้าใจว่าผู้ถอดเสียง ผู้แปล และผู้อำนวยความสะดวกในการสนทนากลุ่มนั้นผูกพันตามกฎการรักษาความลับเช่นเดียวกับนักวิจัยคนอื่นๆ ในการศึกษานี้

คุณช่วยยืนยันได้หรือไม่ว่าคุณเข้าใจว่าผู้วิจัยจะไม่ถามคุณโดยตรงเกี่ยวกับประสบการณ์ของคุณ แต่คุณมีอิสระที่จะแบ่งปันหากคุณต้องการ

คุณช่วยยืนยันได้หรือไม่ว่าคุณเข้าใจว่าคุณไม่ควรเปิดเผยข้อมูลใด ๆ ที่คุณได้ยินจากกลุ่มนี้ให้กับบุคคลอื่น

คุณยืนยันได้หรือไม่ว่าคุณเข้าใจด้วยว่าผู้วิจัยไม่สามารถควบคุมสิ่งที่ผู้เข้าร่วมการศึกษารายอื่นอาจพูดนอกกลุ่มได้ และคุณอาจต้องการระมัดระวังเกี่ยวกับสิ่งที่คุณเปิดเผยในกลุ่มนี้

คุณช่วยยืนยันได้หรือไม่ว่าคุณเข้าใจว่าในการสนทนากลุ่มเราจะไม่ถามถึงประสบการณ์ส่วนตัวของคุณในเรื่องการใช้สารและชีวิตส่วนตัวอื่น ๆ ที่อาจผิดกฎหมายได้ และขอให้คุณยืนยันว่าจะไม่แชร์เรื่องดังกล่าวในการสนทนากลุ่มด้วย

คุณยืนยันว่าคุณยินยอมให้ผู้วิจัยใช้ข้อมูลที่คุณแบ่งปันสำหรับการวิจัยนี้ แต่ไม่เปิดเผยข้อมูลส่วนตัวใดๆ และข้อมูลที่คุณให้จะต้องนำเสนอเป็นส่วนหนึ่งของผลการวิจัยโดยรวม

คุณยืนยันได้ไหมว่าคุณเข้าใจว่าข้อมูลโครงการจะถูกเก็บไว้อย่างปลอดภัยใน UCL Data Safe Haven และการวิจัยทางด้านสังคมศาสตร์และประวัติศาสตร์ในโครงการนี้อยู่บนพื้นฐานของกฎหมาย

คุณยืนยันได้หรือไม่ว่าคุณเข้าใจว่าในตอนท้ายของการศึกษา ข้อมูลที่ไม่ระบุชื่อจากการวิจัยนี้จะถูกวางไว้ในที่เก็บข้อมูลที่ปลอดภัย โดยมีการควบคุมการเข้าถึงอย่างเข้มงวดโดยหัวหน้านักวิจัย ดร.ชาร์ลส์ วิตเซล และมหาวิทยาลัยมหิดล

คุณยืนยันได้หรือไม่ว่าคุณเข้าใจว่าหากคุณมีคำถามใดๆ เกี่ยวกับขั้นตอนการวิจัย คุณสามารถติดต่อ [Charlie Witzel ในภาษาอังกฤษหรือ Thomas Guadamuz ในภาษาไทย]

คุณยืนยันได้หรือไม่ว่าคุณเข้าใจว่าหากคุณได้รับอันตรายในทางใดทางหนึ่งหรือไม่ได้รับการปฏิบัติตามที่ระบุไว้ในเอกสารข้อมูล คุณสามารถติดต่อประธานคณะกรรมการจริยธรรมการวิจัย (คณะสังคมศาสตร์และมนุษยศาสตร์ มหาวิทยาลัยมหิดล) หมายเลขของพวกเขาคือ 02 441 9180

คุณช่วยยืนยันได้หรือไม่ว่าคุณเข้าใจข้อความในเอกสารข้อมูลผู้เข้าร่วมและในแบบฟอร์มยินยอมนี้ และด้วยเหตุนี้คุณจึงให้ความยินยอมในการเข้าร่วมโครงการ

## Interview informed consent script – English version

Informed consent script - Interview

Do you hereby express your consent to participate as a subject in the research project entitled What does it mean to me*? Understanding* hi-fun *and other types of sex with drugs between men*.

In so doing, can you confirm you are informed of the research project’s origin and purpose; its procedures; its expected benefits and risks that may occur, including methods to prevent and handle harm; as well as remuneration and expenses? That you have thoroughly read the statements in the information sheet. You were also given explanations and your questions were answered by the researcher. Do you therefore consent to participate as a subject in this research project?

Can you confirm you are aware of your right to further information concerning benefits and risks from participation in the research project and your right to withdraw or refrain from participation at any time and without any consequence until two weeks after the focus group? After that time it may not be possible to remove your data although we will make every effort to do so if you wish.

Can you confirm you are aware this interview will be audio recorded, transcribed and possibly translated and that you understand that the transcribers, translators and interviewer are bound by the same confidentiality rules as the other researchers on the study?

Do you confirm that you consent to the researchers’ use of the information you share for this research, but do not to any individual disclosure of private information and that the information you provide must be presented as part of the research results as a whole?

Can you confirm that you understand that project data will be securely stored in the UCL Data Safe Haven, and that the legal basis for processing your data is social and historical research?

Can you confirm that you understand that at the end of the study anonymized data from this research will be placed in a secure data repository, with access strictly controlled by the lead researcher Dr Charles Witzel and Mahidol University?

Can you confirm that you understand that if you have any questions about the research procedures, you can contact [Charlie Witzel in English or Thomas Guadamuz in Thai].

Can you confirm you understand that if you are harmed in any way or are not treated as indicated in the information sheet, you can contact the Chair of The Committee for Research Ethics (Social Science) at the office of MUSSIRB. Their number is 02 441 9180.

Can you confirm you understand the statements in the participant information sheet and in this consent form and thereby give your consent?

## Interview informed consent script – Thai version

สคริปต์ในการขอความยินยอม

คุณแสดงความยินยอมที่จะเข้าร่วมโครงการวิจัยที่มีชื่อว่า What does it mean to me? การศึกษา "ไฮฟัน (hi-fun)" และสารทางเพศประเภทต่าง ๆ ระหว่างชายด้วยกัน

ในการทำเช่นนั้น คุณช่วยยืนยันได้ไหมว่าคุณได้รับแจ้งถึงที่มาและวัตถุประสงค์ของโครงการวิจัย ขั้นตอนของโครงการประโยชน์และความเสี่ยงที่อาจเกิดขึ้น รวมถึงวิธีการป้องกันและจัดการกับอันตราย ตลอดจนค่าตอบแทนและค่าใช้จ่าย? คุณได้อ่านข้อความในเอกสารข้อมูลอย่างละเอียดแล้ว คุณได้รับคำอธิบายที่เพียงพอและได้ถามคำถามกับฉันและฉันได้ตอบคำถามและข้อสงสัยของคุณทั้งหมดแล้ว คุณยินยอมที่จะเข้าร่วมเป็นหัวข้อในโครงการวิจัยนี้หรือไม่?

คุณช่วยยืนยันได้หรือไม่ว่าคุณตระหนักถึงสิทธิ์ในข้อมูลเพิ่มเติมเกี่ยวกับผลประโยชน์และความเสี่ยงจากการเข้าร่วมโครงการวิจัย และสิทธิ์ของคุณในการถอนตัวหรืองดเว้นจากการเข้าร่วมเมื่อใดก็ได้ และไม่มีผลกระทบใด ๆ จนกว่าการวิเคราะห์ข้อมูลจะเริ่มขึ้น หลังจากเวลาดังกล่าว คุณอาจไม่สามารถลบข้อมูลของคุณได้

คุณยืนยันได้หรือไม่ว่าคุณทราบว่าการสัมภาษณ์นี้จะถูกบันทึกเสียง ถอดเสียง และอาจแปล และคุณเข้าใจว่าผู้ถอดเสียง ผู้แปล และผู้อำนวยความสะดวกในการสัมภาษณ์นั้นผูกพันตามกฎการรักษาความลับเช่นเดียวกับนักวิจัยคนอื่นๆ ในการศึกษานี้

คุณยืนยันว่าคุณยินยอมให้ผู้วิจัยใช้ข้อมูลที่คุณแบ่งปันสำหรับการวิจัยนี้ แต่ไม่เปิดเผยข้อมูลส่วนตัวใดๆ และข้อมูลที่คุณให้จะต้องนำเสนอเป็นส่วนหนึ่งของผลการวิจัยโดยรวม

คุณยืนยันได้ไหมว่าคุณเข้าใจว่าข้อมูลโครงการจะถูกเก็บไว้อย่างปลอดภัยใน UCL Data Safe Haven และการวิจัยทางด้านสังคมศาสตร์และประวัติศาสตร์ในโครงการนี้อยู่บนพื้นฐานของกฎหมาย

คุณยืนยันได้หรือไม่ว่าคุณเข้าใจว่าในตอนท้ายของการศึกษา ข้อมูลที่ไม่ระบุชื่อจากการวิจัยนี้จะถูกวางไว้ในที่เก็บข้อมูลที่ปลอดภัย โดยมีการควบคุมการเข้าถึงอย่างเข้มงวดโดยหัวหน้านักวิจัย ดร.ชาร์ลส์ วิตเซล และมหาวิทยาลัยมหิดล

คุณยืนยันได้หรือไม่ว่าคุณเข้าใจว่าหากคุณมีคำถามใดๆ เกี่ยวกับขั้นตอนการวิจัย คุณสามารถติดต่อ [Charlie Witzel ในภาษาอังกฤษหรือ Thomas Guadamuz ในภาษาไทย]

คุณยืนยันได้หรือไม่ว่าคุณเข้าใจว่าหากคุณได้รับอันตรายในทางใดทางหนึ่งหรือไม่ได้รับการปฏิบัติตามที่ระบุไว้ในเอกสารข้อมูล คุณสามารถติดต่อประธานคณะกรรมการจริยธรรมการวิจัย (คณะสังคมศาสตร์และมนุษยศาสตร์ มหาวิทยาลัยมหิดล) หมายเลขของพวกเขาคือ 02 441 9180

คุณช่วยยืนยันได้หรือไม่ว่าคุณเข้าใจข้อความในเอกสารข้อมูลผู้เข้าร่วมและในแบบฟอร์มยินยอมนี้ และด้วยเหตุนี้คุณจึงให้ความยินยอมในการเข้าร่วมโครงการ

1. ใช้แบบฟอร์มนี้ได้ก็ต่อเมื่อท่านได้ระบุข้อมูลในข้อ 19 ของแบบเสนอโครงการวิจัยฯ แล้วเท่านั้น [↑](#footnote-ref-1)
2. ใช้แบบฟอร์มนี้ได้ก็ต่อเมื่อท่านได้ระบุข้อมูลในข้อ 19 ของแบบเสนอโครงการวิจัยฯ แล้วเท่านั้น [↑](#footnote-ref-2)
