# Supplementary material for: Hi-fun, homepas and incidental sex with drugs: a qualitative study developing a locally grounded definition of hi-fun (chemsex) compared to other sexualised drug use types practiced by gay, bisexual and other men who have sex with men in Thailand.
Source: Research Square preprint supplement (doi:10.21203/rs.3.rs-7211745/v1), 2025-07-29
Supplement: Supplementary file 6 [file ee34368c17205fe24a283486.docx]

## FGD topic guide - English

**Aim**: To elucidate new understandings, informed by transnational queer sociology, of the meanings and motivations that underpin different types of Sexualised Drug Use (SDU), including *hi-fun*, for MSM and their health and well-being priorities

**Objectives**

- To explore the meanings, motivations and contextual factors that shape *hi-fun* and other SDU
- To develop a definition of *hi-fun* which is grounded in the experience of Thailand for use in further research
- To understand the community assets, health and well-being priorities of MSM engaged in SDU.

**Setting-up**

Arrange tables and chairs - prepare refreshments.

Set up and check the two digital recorders.

Organise focus group materials

Notepad, pen, list of attendees, copy of focus group outline for facilitators

Arrange chart paper and markers

Make sure watch/clock is in sight

**Opening talk**

Pay participants 1,000 THB each.

Introduce facilitators, Mahidol University and UCL

Rules - Share as much or as little information as you are comfortable with

Rules – Reinforce confidentiality of the group

Rules - Respect for other’s opinions / we want everyone to contribute

Rules – We will refer to you by the number on your table for extra privacy

Rules – Will ask questions generally. Please do not share your personal experiences of drug use during the focus group which may be illegal. We’re interested in your opinions on the subject matter rather than your specific experiences.

Describe

- Why we are collecting survey information at the beginning of the group
- Audio will be recorded so we capture everything you say, after it is transcribed/translated the audio file will be deleted.
- Data will be held in UCL safe haven, this is a secure data storage facility in the UK
- All transcribers and translators have been specially chosen and are not allowed to share your data with anyone else

Please talk one at a time for recordings’ sake

Group will take about 2 hours and will finish at [time] at the latest

Ask participants to turn off (or at least mute) mobile phones

Invite queries

***Turn on recorder***

Consent process (refer to consent script, participants information sheet and consent form)

Turn on recorder

**Opening – defining *hi-fun* and other sex with drugs.**

[Explores meanings around *hi-fun* / other SDU]

So first I’d like us to all go around the room and get to know each other better. Please don’t use your real name, but do tell us one thing that you like about your gay group, gay friends or about being a gay or bi man.

Now I’d like us to think a bit about what is meant by *hi-fun* and how it might be different or similar to other kinds of sex on drugs. [Check everyone in the group understands *hi-fun*]. Can you tell me what the term *hi-fun* means to you?

What drugs do you most associate with *hi-fun*? Are there any drugs that definitely aren’t *hi-fun* drugs?

[*prompt*] Are there some drugs that can be depending on the circumstance? And what about combining drugs? [*ensure poppers as used on their own is explored*]

[*prompt*] What about how drugs are used? How important or common is slamming/injecting in *hi-fun*?

What does the frequency of *hi-fun* depend on? Budget, friends, events, partners, or other?

Are there any sexual behaviours that are especially or usually a part of *hi-fun?* [*prompt* *around group sex, condom (non)use*]

Where does *hi-fun* usually take place? How does the setting influence *hi-fun*?

[prompt] How about atmosphere? (sound, lighting, theme, group party or private)

What role, if any, does the internet, including apps and social media, have in *hi-fun*?

What apps or social media sites are most important?

How has *hi-fun* changed in the last few years, if at all?

[*if no clear consensus has been reached*] How do you define what is or isn’t *hi-fun*?

Now we’re curious about if and how *hi-fun* is different from other types of sex with drugs that gay and bisexual men might have. Can you think of ways that men combine sex and drugs that are different from *hi-fun*?

How about meeting someone at a bar when both people have been doing drugs and then have sex together after? Or afterparty following a club? Sex with partners involving drugs?

Can you think of other scenarios where men combine sex and drugs that are different from *hi-fun*?

What about the drugs used? Are they always different from *hi-fun* drugs or can there be overlap?

Has any of this changed in the last few years?

Now I’d like us to do a quick activity. Together, I’d like us to make a list of the different types of drugs that are used either in *hi-fun* or in other types of sex and drugs. While we do so let’s talk together about why people might use these drugs. [*Make list together and write them on post-it notes, ensure the following are captured: methamphetamine, GHB/GBL, yaba, ecstasy/MDMA, cocaine, ketamine]*

Great, we’ve got a really comprehensive list of drugs here. Now I’d like to arrange these on the table based on whether or not they are part of *hi-fun*, other types of sex on drugs, or either. [*organise on a spectrum, one end of table represents* hi-fun*, other types of sex on drugs at the other end. Drugs that fit into either go into the middle. Photograph results]*

***Break***

**Influences on *hi-fun* and other sex with drugs**

[Establishes motivations and assesses influences on *hi-fun* and other SDU including personal backgrounds, nationality, class, income]

That’s great, I’ve got a really good sense of what *hi-fun* is. I’d now like to think a bit about the different motivations for having *hi-fun*.

What are the reasons that people engage in *hi-fun*?

Are there specific groups you think are more or less likely to have *hi-fun?* [prompt around older/younger/foreign/Thai/sex work]

Do you think *hi-fun* parties might be different when there are a bigger mix of nationalities or types of people? If so, how?

How about other types of sex with drugs. Are these motivations the same or different to *hi-fun*?

What are the reasons that people combine sex and drugs in other ways?

How is this different from *hi-fun*?

Are there specific groups you think are more or less likely to have other types of sex with drugs*?*

[prompt: older/younger/foreign/Thai/middle-class/sex workers]

Now I want to think about both *hi-fun* and other types of sex and drugs together.

What affect, if any, do the police or the law have on *hi-fun* and other sex with drugs?

How, if at all, do differences in cultural background shape *hi-fun* or other types of sex and drugs?

When we think about *hi-fun* and other types of sex with drugs, do some men or some groups of men have more power or control? Which groups are these? How about groups with less power?

Prompts:

How does ethnicity/gender identity/class/income/language impact on power or control, if at all?

What impacts do these differences in power or control have on other men? What about impacts on groups as a whole?

**Strengths and challenges**

In this final section I would like to think together about some of the strengths of communities of men who have *hi-fun* and other types of sex with drugs, as well as some of the challenges they face. Let’s talk about what the challenges are first

Prompts:

- Overdose
- Police violence
- Mental health issues
- HIV and other STIs
- Sexual assaults
- Trauma
- Family problems
- Stigma
- Triggers and addition issues

That’s really useful. Now I’d like to list these in order of importance. Which of these do you think are the most important and which are the least? [*work together to order list*]. Are there any differences here between *hi-fun* and other types of sex with drugs?

Let’s now think together about when *hi-fun* and other types of sex and drugs isn’t a problem and when it might become a problem for someone. How do you know when someone is experiencing challenges in this area? [*ensure that the influence of masculinity and gay culture is explored in this section*]

[*prompt*] How, if at all, do individuals understand when their *hi-fun* becomes a problem?

Now I’d like to think about community strengths. These are the positive things that people who have *hi-fun* and other types of sex on drugs might have. Can everyone think of how the good or strong aspects of these communities? [*Write down on flip chart*]

Prompts:

- Care for others
- Engaged in sexual health
- Social connectedness
- Intimacy
- Pleasure
- Resourcefulness
- Communication
- Fun
- Adventurous
- Self-control

That’s really useful. Now I’d like to list these in order of importance. Which of these do you think are the most important and which are the least? [*work together to order list*].

**Wrap-up**

Thanks so much, that is the end of our questions. Is there anything else you would like to share that you think we should know about?

# Interview topic guide - English

**Opening talk**

Introduction of interviewer, Mahidol University and UCL

Share as much or as little information as you are comfortable with

Will ask questions generally. Feel free to share or not share personal experiences. We’re interested in your views most of all.

Describe the reason for audio recording and later destruction

Interview will take about 1 hour

***Turn on recorder***

Consent process (refer to consent script, participants information sheet)

**Opening – defining *hi-fun* and other sex with drugs.**

[Explores meanings around *hi-fun* / other SDU]

Now I’d like us to think a bit about what is meant by *hi-fun* and how it might be different or similar to other kinds of sex on drugs. [Check the interviewee understands *hi-fun*]. Can you tell me what the term *hi-fun* means to you?

What are the positive elements of *hi-fun*?

What drugs do you most associate with *hi-fun*? Are there any drugs that definitely aren’t *hi-fun* drugs?

[*prompt*] Are there some drugs that can be depending on the circumstance? And what about combining drugs? [*ensure poppers as used on their own is explored*]

Frequency of use in *hi-fun*? (per week or month) what does the frequency depend on? (budget, friends, events, partners, or other) Do they use other drugs during the week/the month except *hi-fun*? What do they use? Why?

Can you describe a bit about how much *hi-fun* costs? What are some of the expenses that come along with it?

[*prompt*] What about how drugs are used? How important or common is slamming/injecting in *hi-fun*?

Are there any sexual behaviours that are especially or usually a part of *hi-fun?* [*prompt* *around group sex, condom (non)use*]

Where does *hi-fun* usually take place? How does the setting influence *hi-fun*?

How about atmosphere? (sound, lighting, theme, group party or private)

What role, if any, does the internet, including apps and social media, have in *hi-fun*?

How has *hi-fun* changed in the last few years, if at all?

[*if not answered or no clear consensus has been reached*] Do you have a way that you define what is or isn’t *hi-fun*?

Now I’m curious about if and how *hi-fun* is different from other types of sex with drugs that gay and bisexual men might have. Can you think of ways that men combine sex and drugs that are different from *hi-fun*?

Prompts

How about meeting someone at a club or a party when both men have been doing drugs and then have sex together after?

Can you think of other scenarios where men combine sex and drugs that are different from *hi-fun*?

What about the drugs used? Are they always different from *hi-fun* drugs or can there be overlap?

Has any of this changed in the last few years?

Together, I’d like us to make a list of the different types of drugs that are used either in *hi-fun* or in other types of sex and drugs. While we do so let’s talk together about why people might use these drugs. [*Make list together and write on post-it notes, ensure the following are captured: methamphetamine, GHB/GBL, yaba, ecstasy/MDMA, cocaine, ketamine]*

Great, we’ve got a really comprehensive list of drugs here. I’d like to discuss together whether or not they are part *hi-fun*, other types of sex on drugs, or either. [*go through each drug individually and establish whether part of* hi-fun*, other sex and drugs, or neither. Photograph results*]

**Influences on *hi-fun* and other sex with drugs**

[Establishes motivations and assesses influences on *hi-fun* and other SDU including personal backgrounds, nationality, class, income]

That’s great, I’ve got a really good sense of what *hi-fun* is. I’d now like to think a bit about the different motivations for having *hi-fun*.

What are the main reasons that people engage in *hi-fun*?

[*If not answered*] How about the positive reasons

How about more uncommon reasons, so reasons that are important for a smaller group of people?

Are there specific groups you think are more or less likely to have *hi-fun?* [prompt around older/younger/foreign/Thai/sex work]

Do you think *hi-fun* parties might be different when there are a bigger mix of nationalities or types of people? If so, how?

How about other types of sex with drugs. Are these motivations the same or different to *hi-fun*?

What are the main reasons that people combine sex and drugs in other ways?

What about the less common reasons? How is this different from *hi-fun*?

Are there specific groups you think are more or less likely to have other types of sex with drugs*?* [prompt: older/younger/foreign/Thai/middle-class/sex work engaged]

Now I want to think about both *hi-fun* and other types of sex and drugs together.

What affect, if any, do the police or the law have on *hi-fun* and other sex with drugs?

How, if at all, do differences in cultural background shape *hi-fun* or other types of sex and drugs?

When we think about *hi-fun* and other types of sex with drugs, do some men or some groups of men have more power or control? Which groups are these? How about groups with less power?

Prompts:

How does ethnicity/gender identity/class/income/language impact on power or control, if at all?

What impacts do these differences in power or control have on other men? What about impacts on groups as a whole?

**Strengths and challenges**

In this final section I would like to think together about some of the strengths of communities of men who have *hi-fun* and other types of sex with drugs, as well as some of the challenges they face. Let’s talk about what the challenges are first. What do you think is the biggest challenge people who combine sex with drugs face in their lives?

Let’s now think together about when *hi-fun* and other types of sex and drugs isn’t a problem and when it might become a problem for someone. How do you know when someone is experiencing challenges in this area? [*ensure that the influence of masculinity and gay culture is explored in this section*]

Now I’d like to think about community strengths. So, these are the positive things that people who have *hi-fun* and other types of sex on drugs might have. Can you think of how the good or strong aspects of these communities?

That’s really useful. Now I’d like to think about which of these are most important and which are the least? [*discuss list together*].

**Wrap-up**

Thanks so much, that is the end of our questions. Is there anything else you would like to share that you think we should know about?

# Focus group topic guide – Thai version

**What does it mean to me? การศึกษา "ไฮฟัน (hi-fun)" และสารทางเพศประเภทต่าง ๆ ในกลุ่มเกย์ ไบเซ็กชวล และชายที่มีเพศสัมพันธ์กับชาย (GBMSM) ในประเทศไทย**

**จุดมุ่งหมาย:** เพื่อสร้างความเข้าใจใหม่ในด้านสังคมวิทยาเควียร์ระหว่างประเทศ (transnational queer sociology) ว่าด้วยเรื่องการให้ความหมายและแรงจูงใจที่เป็นรากฐานของการใช้สารเสพติดทางเพศประเภทต่างๆ (รวมถึง *ไฮ-ฟัน*) ในกลุ่มชายรักชาย และการให้ความสำคัญต่อภาวะสุขภาพของพวกเขา

**วัตถุประสงค์**

1. เพื่อสำรวจความหมาย แรงจูงใจ และปัจจัยทางบริบทต่างๆ ที่ก่อให้เกิด “ไฮ-ฟัน” รวมถึงการใช้สารเสพติดทางเพศรูปแบบอื่นๆ

2. เพื่อสร้างคำจำกัดความของ “ไฮ-ฟัน” โดยอิงจากประสบการณ์ต่างๆ ที่เกิดขึ้นในประเทศไทย ทั้งนี้เพื่อใช้ในการวิจัยต่อไป

3.เพื่อทำความเข้าใจทรัพยากรในชุมชนตลอดจนลำดับความสำคัญด้านสุขภาพและความเป็นอยู่ที่ดีของกลุ่ม ชายรักชายที่มีส่วนร่วมในการใช้สารเสพติดทางเพศ

**สิ่งที่ต้องจัดเตรียม**

โต๊ะและเก้าอี้ พร้อมเครื่องดื่ม

เครื่องบันทึกดิจิทัล 2 เครื่อง

สื่อต่างๆ สำหรับการสนทนากลุ่ม

กระดาษจด ปากกา รายชื่อผู้เข้าร่วม แผนการสนทนากลุ่ม

กระดาษชาร์ตและมาร์กเกอร์

ตรวจดูให้แน่ใจว่ามีนาฬิกาอยู่ในบริเวณที่สามารถมองเห็นได้

**การกล่าวเปิด**

กล่าวแนะนำกระบวนกรจากมหาวิทยาลัยมหิดล และ UCL

กฎ - แชร์ข้อมูลมากหรือน้อยเท่าที่คุณต้องการ

กฎ – เน้นย้ำเรื่องการรักษาความลับของกลุ่ม

กฎ - เคารพความคิดเห็นของผู้อื่น / เราต้องการให้ทุกคนมีส่วนร่วม

กฎ – จะถามคำถามทั่วไป โดยคุณสามารถเลือกที่จะแชร์ประสบการณ์ส่วนตัวหรือไม่ก็ได้ โดยเราสนใจในมุมมองของคุณมากที่สุด

อธิบายเหตุผลว่าทำไมจึงต้องมีการบันทึกเสียง และทำลายทิ้งในภายหลัง

ขอให้ผู้เข้าร่วมพูดทีละคนเพื่อความชัดเจนในการบันทึกเสียง

การสนทนากลุ่มจะใช้เวลาประมาณ 2 ชั่วโมง และจะเสร็จสิ้นในเวลา [เวลา] อย่างช้าที่สุด

ขอให้ผู้เข้าร่วมปิด (หรืออย่างน้อยปิดเสียง) โทรศัพท์มือถือ

เชิญชวนให้ผู้เข้าร่วมถามคำถาม

กระบวนการแสดงเจตนายินยอมเข้าร่วมการวิจัย (เอกสารชี้แจ้งผู้เข้าร่วม แบบฟอร์มขอคำยินยอม และสคริปต์ในการขอความยินยอม)

เปิดเครื่องบันทึก

**เปิด – ให้คำจำกัดความของคำว่า *“ไฮ-ฟัน”* และสารเสพติดทางเพศในลักษณะอื่นๆ**

[สำรวจความหมายอื่นๆ ของ *“ไฮ-ฟัน”* / การใช้สารเสพติดทางเพศอื่นๆ]

เริ่มต้น ผม/ดิฉันอยากให้พวกเราทุกคนเดินไปรอบๆ พร้อมแนะนำตัวเอง ไม่ต้องกลัวที่จะเปิดเผยชื่อจริงของตัวเอง แต่อยากให้ทุกคนบอกเล่าสิ่งที่น่าสนใจเกี่ยวกับตัวเองเพื่อให้เราได้รู้จักคุณมากขึ้น

ทีนี้ อยากชวนทุกคนคิดร่วมกันว่า *“ไฮ-ฟัน”* ในความหมายของคุณคืออะไร เหมือนหรือแตกต่างจากการมีเพศสัมพันธ์โดยใช้ยาเสพติดรูปแบบอื่นอย่างไร [เช็คว่าทุกคนในกลุ่มเข้าใจความหมายของ *“ไฮ-ฟัน”*] ช่วยบอกหน่อยได้ไหมว่า คำว่า *ไฮ-ฟัน”* ในความหมายของคุณเป็นอย่างไร?

ยาเสพติดอะไรที่คุณเชื่อมโยงกับ *“ไฮ-ฟัน”* มากที่สุด? มีอะไรบ้างที่ถือว่าไม่ใช่สารเสพติด?

[ข้อมูลแนะนำ] มีสารเสพติดบางชนิดที่นำมาใช้ตามสถานการณ์หรือไม่? แล้วการใช้สารเสพติดแบบผสมล่ะ? [*ให้พิจารณาเรื่องการใช้ป๊อปเปอร์กับตัวเองด้วย*]

ความบ่อยในการมี *“ไฮ-ฟัน”* (ต่อสัปดาห์หรือต่อเดือน) ความบ่อยขึ้นอยู่กับอะไร? (งบ เพื่อน กิจกรรม คู่รัก หรืออื่นๆ) พวกเขาใช้สารเสพติดอื่นนอกเหนือจาก *“ไฮ-ฟัน”* ในระหว่างสัปดาห์/เดือน หรือไม่? พวกเขาใช้อะไร? ทำไมถึงใช้?

ค่าใช้จ่ายต่าง ๆ ที่เกี่ยวข้องกับ “ไฮ-ฟัน”

[*ข้อมูลแนะนำ*] แล้ววิธีการใช้ยาล่ะ? การฉีดถือเป็นวิธีที่นิยมใช้กันทั่วไปหรือไม่?

มีพฤติกรรมทางเพศอะไรไหมที่มักพบในการมี *“ไฮ-ฟัน”* ? [*ข้อมูลแนะนำ* เช่น การมีเซ็กส์หมู่ (การใช้หรือไม่ใช้)ถุงยาง]

ปกติมี *“ไฮ-ฟัน”* กันที่ไหน? สภาพแวดล้อมมีผลต่อการ *“ไฮ-ฟัน”* อย่างไร? แล้วในเรื่องบรรยากาศล่ะ? (เสียง แสง ธีม ปาร์ตี้แบบกลุ่ม หรือแบบส่วนตัว)

(ถ้ามี) อินเทอร์เน็ต รวมถึงแอปและโซเชียลมีเดีย มีบทบาทอย่างไรในการ *“ไฮ-ฟัน”* ?

*“ไฮ-ฟัน”* เปลี่ยนไปอย่างไรในช่วงไม่กี่ปีที่ผ่านมา?

[*หากยังไม่ได้รับคำตอบหรือยังไม่มีความสอดคล้องในคำตอบที่ชัดเจน*] คุณมีวิธีกำหนดอย่างไร ว่าสิ่งนี้คือใช่หรือไม่ใช่ *“ไฮ-ฟัน”*?

ตอนนี้ ผม/ดิฉันสงสัยว่า สำหรับกลุ่มเกย์และไบเซ็กชวล การมี *“ไฮ-ฟัน”* มีความแตกต่างจากการมีเพศสัมพันธ์โดยใช้ยาเสพติดในลักษณะอื่นๆ อย่างไร คุณคิดว่า ผู้ชายคนอื่นๆ ใช้ยาเสพติดในการมีเพศสัมพันธ์ในลักษณะที่แตกต่างออกไปอย่างไร?

ข้อมูลแนะนำ

แล้วการได้ไปเจอใครสักคนที่คลับหรืองานปาร์ตี้ โดยที่พบว่ามีชายทั้งสองกำลังเสพยาแล้วพากันไปมีเพศสัมพันธ์กันภายหลังล่ะ?

คุณคิดว่า มีการใช้ยาเสพติดขณะมีเพศสัมพันธ์ในลักษณะอื่นๆ ที่แตกต่างจาก *“ไฮ-ฟัน”* บ้างไหม?

แล้วยาเสพติดที่ใช้ล่ะ? แตกต่างจากที่ใช้ในการมี *“ไฮ-ฟัน”* เสมอไปไหม หรือบางทีก็อาจมีการใช้ยาเสพติดชนิดเดียวกันบ้าง?

มีอะไรเปลี่ยนแปลงไปบ้างหรือไม่ในช่วงไม่กี่ปีที่ผ่านมา?

ตอนนี้ ผม/ดิฉันอยากให้เราทำกิจกรรมร่วมกันแบบเร็วๆ โดยช่วยกันลิสท์รายชื่อยาประเภทต่างๆ ที่ใช้ในการมี *“ไฮ-ฟัน”* หรือการมีเพศสัมพันธ์โดยใช้ยาเสพติดในลักษณะอื่นๆ ในขณะที่ทำ ผม/ดิฉันอยากชวนคุยว่า ทำไมพวกเขาถึงใช้ยาเหล่านี้ [ลิสท์รายชื่อยาร่วมกันและเขียนลงบนกระดาษโพสต์อิท โดยตรวจดูให้แน่ใจว่ามีรายชื่อยาเสพติดดังต่อไปนี้: เมทแอมเฟตามีน, GHB/GBL, ยาบ้า, ยาอี/MDMA, โคเคน, คีตามีน]

เยี่ยมเลย ตอนนี้เรามีรายชื่อยาเสพติดต่างๆ ค่อนข้างครอบคลุม ทีนี้ ผม/ดิฉันจะจัดเรียงรายชื่อยาเหล่านี้ไว้บนโต๊ะ โดยเราจะมาดูกันว่า มียาชนิดไหนบ้างที่มักถูกนำมาใช้ในการ *“ไฮ-ฟัน”* ยาชนิดไหนบ้างที่มักถูกนำมาใช้ในการมีเพศสัมพันธ์โดยใช้ยาเสพติดในลักษณะอื่นๆ หรือยาชนิดไหนบ้างสามารถนำมาใช้ได้ในทั้งสองกรณี [*จัดเรียงตามสเปกตรัม โดยปลายโต๊ะด้านหนึ่ง คือ “ไฮ-ฟัน” ส่วนอีกด้านหนึ่ง คือ การมีเพศสัมพันธ์รูปแบบอื่นๆ ที่ใช้สารเสพติด สารเสพติดที่มักนำมาใช้ในทั้งสองกรณีจะวางอยู่ตรงกลาง ถ่ายภาพผลลัพธ์*]

**อิทธิพลต่อการมี *“ไฮ-ฟัน”* และการใช้ยาเสพติดขณะมีเพศสัมพันธ์**

[สร้างแรงจูงใจและประเมินอิทธิพลต่างๆ รวมถึงภูมิหลังของแต่ละบุคคล สัญชาติ ชนชั้น รายได้ ที่มีต่อการ*“ไฮ-ฟัน”* และการใช้สารเสพติดทางเพศอื่นๆ]

เยี่ยมมาก ผม/ดิฉันพอจะเข้าใจดีแล้วว่า *“ไฮ-ฟัน”*  หมายถึงอะไร ตอนนี้ผม/ดิฉันอยากจะชวนคิดร่วมกันเกี่ยวกับแรงจูงใจต่างๆ ของการ “*ไฮ-ฟัน”*

อะไรคือสาเหตุหลักที่ทำให้คนทำ *“ไฮ-ฟัน”* ?

มีเหตุผลอื่นที่ไม่ค่อยพบได้ทั่วไปอีกบ้างไหมที่อาจจะมีความสำคัญสำหรับคนเพียงกลุ่มเล็กๆ กลุ่มหนึ่ง?

มีคนบางกลุ่มที่คุณคิดว่ามีแนวโน้มไม่มากก็น้อยที่จะอยากมี *“ไฮ-ฟัน”* หรือไม่? [ข้อมูลแนะนำ เช่น ผู้สูงอายุ/เยาวชน/คนต่างชาติ/ชาวไทย/คนขายบริการทางเพศ]

คุณคิดว่า ปาร์ตี้ *“ไฮ-ฟัน”*  อาจจะมีความแตกต่างออกไป หากผู้เข้าร่วมมีความหลากหลายเชื้อชาติ หรือหลากหลายประเภทมากขึ้น? ถ้าใช่ ทำไมคุณจึงคิดเช่นนั้น?

การใช้ยาเสพติดขณะมีเพศสัมพันธ์ในลักษณะอื่นๆ เป็นอย่างไร? เหล่านี้มีแรงจูงใจเหมือนหรือแตกต่างจาก *“ไฮ-ฟัน”* หรือไม่?

อะไรคือสาเหตุหลักที่ทำให้มีการใช้ยาเสพติดขณะมีเพศสัมพันธ์ในลักษณะอื่นๆ?

มีเหตุผลอื่นที่ไม่ค่อยพบได้ทั่วไปอีกบ้างไหม? แล้วต่างจาก *“ไฮ-ฟัน”* อย่างไร ?

มีคนบางกลุ่มที่คุณคิดว่ามีแนวโน้มไม่มากก็น้อยที่จะอยากใช้ยาเสพติดขณะมีเพศสัมพันธ์ในลักษณะอื่นๆ หรือไม่? [ข้อมูลแนะนำ เช่น ผู้สูงอายุ/เยาวชน/คนต่างชาติ/ชาวไทย/คนชั้นกลาง/ผู้ที่มีส่วนร่วมกับงานบริการทางเพศ]

ตอนนี้ ผม/ดิฉันอยากจะชวนคิดร่วมกันทั้งเรื่อง *“ไฮ-ฟัน”* และการใช้ยาเสพติดขณะมีเพศสัมพันธ์ในลักษณะอื่นๆ

ตำรวจหรือกฎหมายมีผลอย่างไรกับการ *“ไฮ-ฟัน”* และการใช้ยาเสพติดขณะมีเพศสัมพันธ์ในลักษณะอื่นๆ (ถ้ามี)

ความแตกต่างในด้านภูมิหลังทางวัฒนธรรมจะส่งผลต่อการ*“ไฮ-ฟัน”* และการใช้สารเสพติดขณะมีเพศสัมพันธ์ในลักษณะอื่นๆ ได้อย่างไร?

เมื่อเรานึกถึงเรื่องการ*“ไฮ-ฟัน”* และการใช้สารเสพติดขณะมีเพศสัมพันธ์ในลักษณะอื่นๆ คุณคิดว่ามีความเป็นไปได้ไหมที่อาจจะมีคนบางกลุ่มที่ถืออำนาจมากกว่า? คุณคิดว่ากลุ่มคนเหล่านี้คือใคร? แล้วใครคือกลุ่มคนที่ถืออำนาจน้อยกว่า?

ข้อมูลแนะนำ:

ชาติพันธุ์/อัตลักษณ์ทางเพศ/ชนชั้น/รายได้/ภาษา มีผลต่อเรื่องอำนาจอย่างไร?

ความแตกต่างด้านอำนาจเหล่านี้มีผลอะไรต่อผู้ชายคนอื่นๆ? แล้วผลกระทบที่มีต่อผู้ชายในกลุ่มโดยรวมหละ?

**ข้อได้เปรียบและความท้าทาย**

ในส่วนสุดท้ายนี้ ผม/ดิฉันอยากจะชวนคิดร่วมกันเกี่ยวกับข้อได้เปรียบบางประการของกลุ่มชายรักชายที่ทำ *“ไฮ-ฟัน”*  และใช้ยาเสพติดขณะมีเพศสัมพันธ์ในลักษณะอื่นๆ รวมถึงความท้าทายบางประการที่พวกเขาต้องเผชิญ โดยเรามาพูดถึงเรื่องความท้าทายกันก่อน

ข้อมูลแนะนำ:

- การใช้ยาเกินขนาด
- ความรุนแรงของตำรวจ
- ปัญหาสุขภาพจิต
- ความเสี่ยงต่อ HIV และโรคติดต่อทางเพศสัมพันธ์อื่น ๆ
- การล่วงละเมิดทางเพศ
- ปัญหาครอบครัว

นั่นมีประโยชน์จริงๆ ตอนนี้ผม/ดิฉันอยากจะลิสท์รายการเหล่านี้ตามลำดับความสำคัญ คุณคิดว่าข้อใดที่สำคัญที่สุดและข้อใดน้อยที่สุด [ช่วยกันเรียงลำดับความสำคัญของรายการต่างๆ] มีความแตกต่างระหว่าง *“ไฮ-ฟัน”* และการใช้ยาเสพติดขณะมีเพศสัมพันธ์ในลักษณะอื่นๆ หรือไม่?

ตอนนี้เรามาดูกันว่าเมื่อใดที่ *“ไฮ-ฟัน”* และการใช้ยาเสพติดขณะมีเพศสัมพันธ์ในลักษณะอื่นๆ จะไม่เป็นปัญหา และเมื่อใดที่อาจจะกลายเป็นปัญหาสำหรับใครบางคน? คุณจะรู้ได้อย่างไรเมื่อมีคนกำลังเผชิญกับความท้าทายในด้านนี้? [ตรวจดูในเรื่องอิทธิพลของความเป็นชายและวัฒนธรรมเกย์ได้ในส่วนนี้]

ตอนนี้ผม/ดิฉันอยากจะชวนคิดร่วมกันถึงข้อได้เปรียบของชุมชนนี้ ต่อไปนี้คือข้อดีของผู้ที่ทำ*“ไฮ-ฟัน”*  และใช้ยาเสพติดขณะมีเพศสัมพันธ์ในลักษณะอื่นๆ อาจมี ทุกคนคิดออกไหมว่าคนกลุ่มนี้มีด้านดีหรือข้อได้เปรียบอย่างไร? [เขียนลงในฟลิปชาร์ต]

ข้อมูลแนะนำ:

- มีความใส่ใจผู้อื่น
- รู้จักดูแลสุขภาพทางเพศ
- มีความเชื่อมโยงทางสังคม
- มีความใกล้ชิดสนิทสนม
- มีความเพลิดเพลิน
- มีไหวพริบ
- รู้จักสื่อสาร
- มีความสนุกสนาน
- กล้าผจญภัย
- รู้จักควบคุมตนเอง

นั่นมีประโยชน์จริงๆ ตอนนี้ผม/ดิฉันอยากจะลิสท์รายการเหล่านี้ตามลำดับความสำคัญ คุณคิดว่าข้อใดที่สำคัญที่สุดและข้อใดน้อยที่สุด [ช่วยกันเรียงลำดับความสำคัญของรายการต่างๆ]

**สรุป**

ขอขอบคุณทุกคนเป็นอย่างมาก ตอนนี้หมดคำถามของเราแล้ว ยังมีอะไรที่คุณอยากจะแชร์เพิ่มเติมและคิดว่าเป็นสิ่งที่เราควรรู้อีกไหม

# Interview topic guide – Thai version

What does it mean to me? การศึกษา "ไฮฟัน (hi-fun)" และสารทางเพศประเภทต่าง ๆ ในกลุ่มเกย์ ไบเซ็กชวล และชายที่มีเพศสัมพันธ์กับชาย (GBMSM) ในประเทศไทย

**จุดมุ่งหมาย:** เพื่อสร้างความเข้าใจใหม่ในด้านสังคมวิทยาเควียร์ระหว่างประเทศ (transnational queer sociology) ว่าด้วยเรื่องการให้ความหมายและแรงจูงใจที่เป็นรากฐานของการใช้สารเสพติดทางเพศประเภทต่างๆ (รวมถึง *ไฮ-ฟัน*) ในกลุ่มชายรักชาย และการให้ความสำคัญต่อภาวะสุขภาพของพวกเขา

**วัตถุประสงค์**

1. เพื่อสำรวจความหมาย แรงจูงใจ และปัจจัยทางบริบทต่างๆ ที่ก่อให้เกิด “ไฮ-ฟัน” รวมถึงการใช้สารเสพติดทางเพศรูปแบบอื่นๆ

2. เพื่อสร้างคำจำกัดความของ “ไฮ-ฟัน” โดยอิงจากประสบการณ์ต่างๆ ที่เกิดขึ้นในประเทศไทย ทั้งนี้เพื่อใช้ในการวิจัยต่อไป

3.เพื่อทำความเข้าใจทรัพยากรในชุมชนตลอดจนลำดับความสำคัญด้านสุขภาพและความเป็นอยู่ที่ดีของกลุ่ม ชายรักชายที่มีส่วนร่วมในการใช้สารเสพติดทางเพศ

**สิ่งที่ต้องจัดเตรียม**

โต๊ะและเก้าอี้ พร้อมเครื่องดื่ม

เครื่องบันทึกดิจิทัล 2 เครื่อง

สื่อต่างๆ สำหรับการสนทนากลุ่ม

กระดาษจด ปากกา รายชื่อผู้เข้าร่วม แผนการสนทนากลุ่ม

กระดาษชาร์ตและมาร์กเกอร์

ตรวจดูให้แน่ใจว่ามีนาฬิกาอยู่ในบริเวณที่สามารถมองเห็นได้

**การกล่าวเปิด**

กล่าวแนะนำกระบวนกรจากมหาวิทยาลัยมหิดล และ UCL

กฎ - แชร์ข้อมูลมากหรือน้อยเท่าที่คุณต้องการ

กฎ – เน้นย้ำเรื่องการรักษาความลับของกลุ่ม

กฎ - เคารพความคิดเห็นของผู้อื่น / เราต้องการให้ทุกคนมีส่วนร่วม

กฎ – จะถามคำถามทั่วไป โดยคุณสามารถเลือกที่จะแชร์ประสบการณ์ส่วนตัวหรือไม่ก็ได้ โดยเราสนใจในมุมมองของคุณมากที่สุด

อธิบายเหตุผลว่าทำไมจึงต้องมีการบันทึกเสียง และทำลายทิ้งในภายหลัง

ขอให้ผู้เข้าร่วมพูดทีละคนเพื่อความชัดเจนในการบันทึกเสียง

การสนทนากลุ่มจะใช้เวลาประมาณ 2 ชั่วโมง และจะเสร็จสิ้นในเวลา [เวลา] อย่างช้าที่สุด

ขอให้ผู้เข้าร่วมปิด (หรืออย่างน้อยปิดเสียง) โทรศัพท์มือถือ

เชิญชวนให้ผู้เข้าร่วมถามคำถาม

กระบวนการแสดงเจตนายินยอมเข้าร่วมการวิจัย (เอกสารชี้แจ้งผู้เข้าร่วม แบบฟอร์มขอคำยินยอม และสคริปต์ในการขอความยินยอม)

เปิดเครื่องบันทึก

**เปิด – ให้คำจำกัดความของคำว่า *“ไฮ-ฟัน”* และสารเสพติดทางเพศในลักษณะอื่นๆ**

[สำรวจความหมายอื่นๆ ของ *“ไฮ-ฟัน”* / การใช้สารเสพติดทางเพศอื่นๆ]

อยากชวนคิดว่า *“ไฮ-ฟัน”* ในความหมายของคุณคืออะไร เหมือนหรือแตกต่างจากการมีเพศสัมพันธ์โดยใช้ยาเสพติดรูปแบบอื่นอย่างไร [เช็คว่าทุกคนในกลุ่มเข้าใจความหมายของ *“ไฮ-ฟัน”*] ช่วยบอกหน่อยได้ไหมว่า คำว่า *ไฮ-ฟัน”* ในความหมายของคุณเป็นอย่างไร?

ยาเสพติดอะไรที่คุณเชื่อมโยงกับ *“ไฮ-ฟัน”* มากที่สุด? มีอะไรบ้างที่ถือว่าไม่ใช่สารเสพติด?

[ข้อมูลแนะนำ] มีสารเสพติดบางชนิดที่นำมาใช้ตามสถานการณ์หรือไม่? แล้วการใช้สารเสพติดแบบผสมล่ะ? [*ให้พิจารณาเรื่องการใช้ป๊อปเปอร์กับตัวเองด้วย*]

ความบ่อยในการมี *“ไฮ-ฟัน”* (ต่อสัปดาห์หรือต่อเดือน) ความบ่อยขึ้นอยู่กับอะไร? (งบ เพื่อน กิจกรรม คู่รัก หรืออื่นๆ) พวกเขาใช้สารเสพติดอื่นนอกเหนือจาก *“ไฮ-ฟัน”* ในระหว่างสัปดาห์/เดือน หรือไม่? พวกเขาใช้อะไร? ทำไมถึงใช้?

อยากให้คุณเล่าให้ฟังถึงค่าใช้จ่ายต่าง ๆ ที่เกี่ยวข้องกับ “ไฮ-ฟัน” มีค่าใช้จ่ายอะไรบ้าง

[*ข้อมูลแนะนำ*] แล้ววิธีการใช้ยาล่ะ? การฉีดถือเป็นวิธีที่นิยมใช้กันทั่วไปหรือไม่?

มีพฤติกรรมทางเพศอะไรไหมที่มักพบในการมี *“ไฮ-ฟัน”* ? [*ข้อมูลแนะนำ* เช่น การมีเซ็กส์หมู่ (การใช้หรือไม่ใช้)ถุงยาง]

ปกติมี *“ไฮ-ฟัน”* กันที่ไหน? สภาพแวดล้อมมีผลต่อการ *“ไฮ-ฟัน”* อย่างไร? แล้วในเรื่องบรรยากาศล่ะ? (เสียง แสง ธีม ปาร์ตี้แบบกลุ่ม หรือแบบส่วนตัว)

(ถ้ามี) อินเทอร์เน็ต รวมถึงแอปและโซเชียลมีเดีย มีบทบาทอย่างไรในการ *“ไฮ-ฟัน”* ?

*“ไฮ-ฟัน”* เปลี่ยนไปอย่างไรในช่วงไม่กี่ปีที่ผ่านมา?

[*หากยังไม่ได้รับคำตอบหรือยังไม่มีความสอดคล้องในคำตอบที่ชัดเจน*] คุณมีวิธีกำหนดอย่างไร ว่าสิ่งนี้คือใช่หรือไม่ใช่ *“ไฮ-ฟัน”*?

ตอนนี้ ผม/ดิฉันสงสัยว่า สำหรับกลุ่มเกย์และไบเซ็กชวล การมี *“ไฮ-ฟัน”* มีความแตกต่างจากการมีเพศสัมพันธ์โดยใช้ยาเสพติดในลักษณะอื่นๆ อย่างไร คุณคิดว่า ผู้ชายคนอื่นๆ ใช้ยาเสพติดในการมีเพศสัมพันธ์ในลักษณะที่แตกต่างออกไปอย่างไร?

ข้อมูลแนะนำ

แล้วการได้ไปเจอใครสักคนที่คลับหรืองานปาร์ตี้ โดยที่พบว่ามีชายทั้งสองกำลังเสพยาแล้วพากันไปมีเพศสัมพันธ์กันภายหลังล่ะ?

คุณคิดว่า มีการใช้ยาเสพติดขณะมีเพศสัมพันธ์ในลักษณะอื่นๆ ที่แตกต่างจาก *“ไฮ-ฟัน”* บ้างไหม?

แล้วยาเสพติดที่ใช้ล่ะ? แตกต่างจากที่ใช้ในการมี *“ไฮ-ฟัน”* เสมอไปไหม หรือบางทีก็อาจมีการใช้ยาเสพติดชนิดเดียวกันบ้าง?

มีอะไรเปลี่ยนแปลงไปบ้างหรือไม่ในช่วงไม่กี่ปีที่ผ่านมา?

ตอนนี้ ผม/ดิฉันอยากคุณช่วยลิสท์รายชื่อยาประเภทต่างๆ ที่ใช้ในการมี *“ไฮ-ฟัน”* หรือการมีเพศสัมพันธ์โดยใช้ยาเสพติดในลักษณะอื่นๆ ในขณะที่ทำ ผม/ดิฉันอยากชวนคุยว่า ทำไมถึงใช้ยาเหล่านี้ [ลิสท์รายชื่อยาและเขียนลงบนกระดาษโพสต์อิท โดยตรวจดูให้แน่ใจว่ามีรายชื่อยาเสพติดดังต่อไปนี้: เมทแอมเฟตามีน, GHB/GBL, ยาบ้า, ยาอี/MDMA, โคเคน, คีตามีน]

เยี่ยมเลย ตอนนี้เรามีรายชื่อยาเสพติดต่างๆ ค่อนข้างครอบคลุม

ทีนี้ เราจะมาดูกันว่า มียาชนิดไหนบ้างที่มักถูกนำมาใช้ในการ *“ไฮ-ฟัน”* ยาชนิดไหนบ้างที่มักถูกนำมาใช้ในการมีเพศสัมพันธ์โดยใช้ยาเสพติดในลักษณะอื่นๆ หรือยาชนิดไหนบ้างสามารถนำมาใช้ได้ในทั้งสองกรณี [*จัดเรียงตามสเปกตรัม โดยปลายโต๊ะด้านหนึ่ง คือ “ไฮ-ฟัน” ส่วนอีกด้านหนึ่ง คือ การมีเพศสัมพันธ์รูปแบบอื่นๆ ที่ใช้สารเสพติด สารเสพติดที่มักนำมาใช้ในทั้งสองกรณีจะวางอยู่ตรงกลาง ถ่ายภาพผลลัพธ์*]

**อิทธิพลต่อการมี *“ไฮ-ฟัน”* และการใช้ยาเสพติดขณะมีเพศสัมพันธ์**

[สร้างแรงจูงใจและประเมินอิทธิพลต่างๆ รวมถึงภูมิหลังของแต่ละบุคคล สัญชาติ ชนชั้น รายได้ ที่มีต่อการ*“ไฮ-ฟัน”* และการใช้สารเสพติดทางเพศอื่นๆ]

เยี่ยมมาก ผม/ดิฉันพอจะเข้าใจดีแล้วว่า *“ไฮ-ฟัน”*  หมายถึงอะไร ตอนนี้ผม/ดิฉันอยากจะชวนคิดร่วมกันเกี่ยวกับแรงจูงใจต่างๆ ของการ “*ไฮ-ฟัน”*

อะไรคือสาเหตุหลักที่ทำให้คนทำ *“ไฮ-ฟัน”* ?

มีเหตุผลอื่นที่ไม่ค่อยพบได้ทั่วไปอีกบ้างไหมที่อาจจะมีความสำคัญสำหรับคนเพียงกลุ่มเล็กๆ กลุ่มหนึ่ง?

มีคนบางกลุ่มที่คุณคิดว่ามีแนวโน้มไม่มากก็น้อยที่จะอยากมี *“ไฮ-ฟัน”* หรือไม่? [ข้อมูลแนะนำ เช่น ผู้สูงอายุ/เยาวชน/คนต่างชาติ/ชาวไทย/คนขายบริการทางเพศ]

คุณคิดว่า ปาร์ตี้ *“ไฮ-ฟัน”*  อาจจะมีความแตกต่างออกไป หากผู้เข้าร่วมมีความหลากหลายเชื้อชาติ หรือหลากหลายประเภทมากขึ้น? ถ้าใช่ ทำไมคุณจึงคิดเช่นนั้น?

การใช้ยาเสพติดขณะมีเพศสัมพันธ์ในลักษณะอื่นๆ เป็นอย่างไร? เหล่านี้มีแรงจูงใจเหมือนหรือแตกต่างจาก *“ไฮ-ฟัน”* หรือไม่?

อะไรคือสาเหตุหลักที่ทำให้มีการใช้ยาเสพติดขณะมีเพศสัมพันธ์ในลักษณะอื่นๆ?

มีเหตุผลอื่นที่ไม่ค่อยพบได้ทั่วไปอีกบ้างไหม? แล้วต่างจาก *“ไฮ-ฟัน”* อย่างไร ?

มีคนบางกลุ่มที่คุณคิดว่ามีแนวโน้มไม่มากก็น้อยที่จะอยากใช้ยาเสพติดขณะมีเพศสัมพันธ์ในลักษณะอื่นๆ หรือไม่? [ข้อมูลแนะนำ เช่น ผู้สูงอายุ/เยาวชน/คนต่างชาติ/ชาวไทย/คนชั้นกลาง/ผู้ที่มีส่วนร่วมกับงานบริการทางเพศ]

ตอนนี้ ผม/ดิฉันอยากจะชวนคิดร่วมกันทั้งเรื่อง *“ไฮ-ฟัน”* และการใช้ยาเสพติดขณะมีเพศสัมพันธ์ในลักษณะอื่นๆ

ตำรวจหรือกฎหมายมีผลอย่างไรกับการ *“ไฮ-ฟัน”* และการใช้ยาเสพติดขณะมีเพศสัมพันธ์ในลักษณะอื่นๆ (ถ้ามี)

ความแตกต่างในด้านภูมิหลังทางวัฒนธรรมจะส่งผลต่อการ*“ไฮ-ฟัน”* และการใช้สารเสพติดขณะมีเพศสัมพันธ์ในลักษณะอื่นๆ ได้อย่างไร?

เมื่อเรานึกถึงเรื่องการ*“ไฮ-ฟัน”* และการใช้สารเสพติดขณะมีเพศสัมพันธ์ในลักษณะอื่นๆ คุณคิดว่ามีความเป็นไปได้ไหมที่อาจจะมีคนบางกลุ่มที่ถืออำนาจมากกว่า? คุณคิดว่ากลุ่มคนเหล่านี้คือใคร? แล้วใครคือกลุ่มคนที่ถืออำนาจน้อยกว่า?

ข้อมูลแนะนำ:

ชาติพันธุ์/อัตลักษณ์ทางเพศ/ชนชั้น/รายได้/ภาษา มีผลต่อเรื่องอำนาจอย่างไร?

ความแตกต่างด้านอำนาจเหล่านี้มีผลอะไรต่อผู้ชายคนอื่นๆ? แล้วผลกระทบที่มีต่อผู้ชายในกลุ่มโดยรวมหละ?

**ข้อได้เปรียบและความท้าทาย**

ในส่วนสุดท้ายนี้ ผม/ดิฉันอยากจะชวนคิดเกี่ยวกับข้อได้เปรียบบางประการของกลุ่มชายรักชายที่ทำ *“ไฮ-ฟัน”*  และใช้ยาเสพติดขณะมีเพศสัมพันธ์ในลักษณะอื่นๆ รวมถึงความท้าทายบางประการที่พวกเขาต้องเผชิญ โดยเรามาพูดถึงเรื่องความท้าทายกันก่อน คุณคิดว่าอะไรคือความท้าทายที่ใหญ่ที่สุดที่ผู้ที่ใช้สารผสมกันระหว่างเพศสัมพันธ์กับสารเสพติดกำลังเผชิญอยู่

ตอนนี้เรามาดูกันว่าเมื่อใดที่ *“ไฮ-ฟัน”* และการใช้ยาเสพติดขณะมีเพศสัมพันธ์ในลักษณะอื่นๆ จะไม่เป็นปัญหา และเมื่อใดที่อาจจะกลายเป็นปัญหาสำหรับใครบางคน? คุณจะรู้ได้อย่างไรเมื่อมีคนกำลังเผชิญกับความท้าทายในด้านนี้? [ตรวจดูในเรื่องอิทธิพลของความเป็นชายและวัฒนธรรมเกย์ได้ในส่วนนี้]

ตอนนี้ผม/ดิฉันอยากจะชวนคิดร่วมกันถึงข้อได้เปรียบของชุมชนนี้ ต่อไปนี้คือข้อดีของผู้ที่ทำ*“ไฮ-ฟัน”*  และใช้ยาเสพติดขณะมีเพศสัมพันธ์ในลักษณะอื่นๆ อาจมี ทุกคิดออกไหมว่าคนกลุ่มนี้มีด้านดีหรือข้อได้เปรียบอย่างไร?

นั่นมีประโยชน์จริงๆ ตอนนี้ผม/ดิฉันอยากชวนคุณคิดว่าข้อใดที่สำคัญที่สุดและข้อใดน้อยที่สุด [เรียงลำดับความสำคัญของรายการต่างๆ]

**สรุป**

ขอขอบคุณทุกคนเป็นอย่างมาก ตอนนี้หมดคำถามของเราแล้ว ยังมีอะไรที่คุณอยากจะแชร์เพิ่มเติมและคิดว่าเป็นสิ่งที่เราควรรู้อีกไหม
